# Supplementary material for: Using cancer risk algorithms to improve risk estimates and referral decisions
Source: PubMed Central journal article supplement (PMC9053195; doi:10.1038/s43856-021-00069-1), 2022-01-10
Supplement: 43856_2021_69_MOESM4_ESM.pdf [file 43856_2021_69_MOESM4_ESM.pdf]

## **Description of Additional Supplementary Files**

**File Name:** Supplementary Data 1

**Description:** Supplementary Data 1 contains all the data supporting the manuscript.

**File Name:** Supplementary Data 2

**Description:** Supplementary Data 2 is a subset of Supplementary Data 1, supporting Figure 1.
